# 1     **Development of next-generation sequencing-based sterility** 2                                             **test**

3  
4     Jianhui Yue<sup>1,2,\*</sup>, Chao Chen<sup>1,\*</sup>, Xiaohuan Jing<sup>3</sup>, Qiwang Ma<sup>1</sup>, Bo Li<sup>1,#</sup>, Xi Zhang<sup>1,#</sup>

5  
6     <sup>1</sup> BGI-Shenzhen, Shenzhen, 518083, China.

7     <sup>2</sup> Section of Cell Biology and Physiology, Department of Biology, University of  
8     Copenhagen, Copenhagen, Denmark.

9     <sup>3</sup> China National GeneBank, BGI-Shenzhen, Shenzhen, 518120, China.

10    \* These authors contributed equally.

11    # To whom correspondence should be addressed. E-mail: zhangxi1@genomics.cn (Xi  
12    Zhang); libo@genomics.cn (B.L.).

25

26 **Abstract**

27 The sterility testing methods described in pharmacopoeias require an incubation period  
28 of 14 days to obtain analysis results. An alternative method that can significantly  
29 shorten the detection time and improve the accuracy is in urgent need to meet the  
30 sterility testing requirements of regenerative medicine products with a short shelf life.  
31 In this study, we developed the next-generation sequencing-based sterility test (NGSST)  
32 based on sequencing and multiple displacement amplification. The NGSST can be  
33 finished within 48 hours with five steps including whole genome amplification,  
34 sequencing, alignment, sterility testing report, and microorganism identification. We  
35 use RPKM ratio to minorize the influence of environmental bacteria and determine its  
36 cutoff based AUC curve. The NGSST showed high sensitivity in reporting contaminants  
37 at 0.1 CFU in supernatant of biological product or 1 CFU in cell suspension.  
38 Furthermore, we identified microorganisms in 5 primary umbilical cord mesenchymal  
39 stem cell samples that were tested positive by BacT/ALERT 3D. Overall, the NGSST  
40 can serve as a promising alternative for sterility testing of biological products.

## 41 **Introduction**

42 The current ‘gold standard’ compendial test for pharmaceutical sterility testing first  
43 appeared in the British Pharmacopeia in 1932 and has remained fundamentally  
44 unchanged ever since. This test requires that product samples be placed in aerobic and  
45 anaerobic culture medium for 14 days, during which no growth of microorganisms  
46 (bacteria and fungi) should be observed. Although the method can be applied to  
47 biopharmaceuticals, it is not perfect fit for regenerative medicine products used in tissue  
48 engineering, cell and gene therapies, etc. These special biological products are  
49 composed of living cells with relatively small product volume and short shelf life (a  
50 few hours to several days), which is challenging to meet the requirements of large  
51 sample volume and long-term incubation for sterility testing methods in  
52 pharmacopoeias. In particular, the test period of up to 14 days pose a major hurdle for  
53 the release of short-lived cellular products. In addition, the pharmacopoeia methods are  
54 not effective for the detection of many environmental microorganisms that cannot be  
55 cultivated in the culture medium. Therefore, to obtain more comprehensive analysis  
56 and shorter test duration, an alternative sterility test method is needed to improve  
57 product quality and reduce time and cost for product manufacturing and releasing.

58 In 2012, FDA revised 21 CFR 610.12 to encourage the use of the more appropriate  
59 and advanced testing methods to ensure the safety of biological products [1]. The  
60 purpose of the revised requirements of sterility testing is to promote the improvement  
61 and innovation of sterility test methods to meet the challenges of new products such as  
62 viral and gene therapy (VGT) and cell-based products that may be introduced into the  
63 market. Several rapid microbial contamination detection methods have been developed  
64 so far, such as ATP bioluminescence, flow cytometry, nucleic acid amplification, solid  
65 phase cytometry and so on. However, these methods have certain limitations in  
66 sensitivity or accuracy [2-4].

67 Next-generation sequencing (NGS), also known as high-throughput sequencing,  
68 can simultaneously sequence thousands to billions of DNA fragments independently.  
69 Recently, the development of metagenomic NGS (mNGS) technology and rapid

70 bioinformatics pipelines allows unbiased detection of pathogens in samples such as  
71 urine, cerebrospinal fluid, blood and so on [5-9], which may contain mixed populations  
72 of microorganisms. Compared with traditional pharmacopoeia methods, NGS  
73 technology have certain advantages, including (1) shorter detection period; (2) unbiased  
74 detection and identification of microorganisms; (3) higher sensitivity; (4) no need of  
75 cell culturing. However, there are still several challenges in applying NGS technology  
76 in sterility testing, such as the lack of systematic validation and bioinformatics pipeline  
77 for rapid data analysis that can reduce the bioinformatics processing time from days to  
78 several hours [10-11].

79 Multiple displacement amplification (MDA) is a method of whole genome  
80 amplification using very small amounts (<10 pg) of DNA [12]. Currently, most MDA  
81 based single cell whole genome amplification kits were used in human or animal cells.  
82 There is a lack of research on the performance of using MDA for whole genome  
83 amplification of microbes such as bacteria and fungi.

84 In this study, we applied the mNGS/MDA in sterility testing and developed the next-  
85 generation sequencing-based sterility test (NGSST). The NGSST has five steps  
86 including whole genome amplification, sequencing, alignment, sterility test report, and  
87 microorganism identification. To minorize the influence of environmental bacteria, we  
88 used RPKM ratio with cutoff 2.45 to determine microorganism contaminates. The  
89 NGSST showed high sensitivity in reporting contaminates at 0.1CFU in supernatant of  
90 biological product or 1 CPU in cell suspension. Some of these 0.1 CFU microorganism  
91 sample were directly or indirectly (cultured in medium for 14 days) validated by  
92 BacT/ALERT 3D. The NGSST was applied and identified microorganism in 5  
93 primary umbilical cord mesenchymal stem cell samples that were tested positive using  
94 traditional pharmacopoeia method.

95

## 96 **Materials and Methods**

### 97 **Strains**

98 Several strains of microorganisms representing aerobic, anaerobic, Gram-positive,

99 Gram-negative, yeast and fungi were used in this study to assess the novel method of  
100 sterility testing based on NGS. These microorganisms grow slowly, need a large amount  
101 of nutrition, and have a low content of gas chromatography. They were purchased from  
102 national center for medical culture collections (CMCC) in China, typical culture  
103 preservation centers in the United States (ATCC) and Japan Collection of  
104 Microorganisms (JCM) (Table S1).

105 To determine the cell viability, *Staphylococcus aureus*, *Pseudomonas aeruginosa*,  
106 *Bacillus subtilis* and *Escherichia coli* were cultured in tryptic soy broth (TSB) at 35°C  
107 for 3-5 days, while *Clostridium sporogenes* and *Fusobacterium nucleatum* were  
108 prepared in fluid thioglycollate medium (FTM) and incubated at 25 °C for 5-7 days.  
109 Two methods including conventional colony-forming unit (CFU) counting and direct  
110 microscopic count were used to evaluate cell viability. Average CFU number of each  
111 strain was determined by coating 100 µL microorganisms in exponential growth to  
112 tryptic soy agar (TSA) and repeated for at least 3 times. The blood counting chamber  
113 was used for direct microscopic count of microorganisms.

#### 114 **NGSST assay**

115 We developed standard operating procedures (SOPs) for NGS-based sterility test  
116 (NGSST). The NGSST assay workflow was performed as follows. Briefly, the whole  
117 genome DNA were amplified using the MGI Easy Single Cell Whole Genome  
118 Amplification Kit (Shenzhen, China) according to manufacturer's instructions. Nuclear  
119 free water was used as negative control. The concentration and integrity of genomic  
120 DNA were evaluated by using Qubit and agarose gel electrophoresis. Then, the genomic  
121 DNA was purified using Agencourt AMPure XP (Beckman) and used to generate  
122 genomic DNA library. The whole genome sequencing, library construction and 100bp  
123 pair-end sequencing were conducted according to the protocol of DNBSEQ platform  
124 as described previously, and the acquired sequencing data of each sample was no less  
125 than 1Gb [13].

126 For sequence analysis, (1) Firstly, low-quality reads and adapters were filtered by  
127 Fastp software [14]. (2) The above filtered data (called clean reads) was aligned to the  
128 human reference genome hg38 by hisat2 [15]. (3) We then extracted the reads that

129 mapped to the endogenous virus sequence of hg38, and (4) combined the reads mapped  
130 to the endogenous virus sequence with the reads not mapped to human reference  
131 genome hg38, and aligned them to the MetaPhlAn2 markers database [16]. (5) Finally,  
132 we analyzed the statistics of the above results, and calculated the number of reads of  
133 specific microorganisms per kilobase per million mapped reads (RPKM). The RPKM  
134 ratio (RPKMr) for each microorganism was defined as:

$$135 \quad \text{RPKM ratio} = \text{RPKM (sample)} / \text{RPKM (sterile water)}.$$

136 The minimum RPKM (sterile water) was set to 1.

### 137 **Establishment of detection parameters**

138 The potential application of NGSST method was first verified in detecting microbial  
139 contamination under a given set of specific experimental conditions, and the differences  
140 in performance between the NGS-based method and the pharmacopoeia method were  
141 assessed.

142 To evaluate analytical performance of the NGSST, six model microorganisms at 0.1,  
143 0.2, 0.5, 1, 5, 10, 50 and 100 CFU were prepared and tested by NGSST method. The  
144 RPKMr were calculated based on the alignment results from MetaPhlAn2 database,  
145 and limits of detection were evaluated. The ROC curve was drawn in R software  
146 (version 3.6.0) through pROC package to determine the 95% limits of detection (LOD).  
147 The criterion of RPKMr was established according to the ROC curve to report the  
148 detected bacteria or fungi. To evaluate the performance of NGSST in detecting early  
149 contamination during cell culture, 0.1, 0.2 and 0.5 CFU *E. coli* were incubated in  
150 DMEM-F12 cell culture medium supplied with 10% FBS for 14 days at 37°C, 5% CO<sub>2</sub>.  
151 The supernatant was then collected for sterility testing using both NGSST and  
152 BacT/ALERT 3D methods.

### 153 **Statistical Analysis**

154 To determine the optimal RPKM ratio threshold, we plotted the receiver operating  
155 characteristic (ROC) curves to determine the best RPKM ratio for the NGSST. The  
156 ROC curve was plotted with a confident level of 95%. The microorganisms that were  
157 added and detected by NGSST would be considered as truth values, while the

158 microorganisms that were not added in the sample but detected would treat as false  
159 positive values. All statistical analysis was done in the R studio.

## 160 **Results**

### 161 **Design of the NGSST development**

162 Highly sensitive and rapid sterility testing plays an important role in biological product  
163 manufacturing such as T cells for adoptive transfer. We designed a novel sterility  
164 testing method based on next-generation sequencing. The schematic diagram of the  
165 NGSST shown in figure 1a includes whole genome amplification of samples, library  
166 construction and sequencing, alignment of reads, sterility testing report, and  
167 microorganism identification.

168 To develop the NGSST, we followed four steps shown in Figure 1b. Firstly, we  
169 selected six model microorganisms (Table 1) including three bacteria strains with high  
170 GC content (*B. subtilis*, *E. coli*, and *P. aeruginosa*), two bacteria strains with low GC  
171 content (*C. sporogenes* and *S. aureus*), and fungi (*C. albicans*). We performed  
172 sequencing and reads mapping on marker genes of the six microorganisms. Secondly,  
173 we determined threshold to report positive results based on ROC (receiver operating  
174 characteristic) curve. Using the reads mapping data, we established limits of detection  
175 (the third step) and identified microorganisms (the fourth step). Finally, we finished the  
176 method development and applied it on biological samples. The sensitivity and accuracy  
177 of the NGSST have also been evaluated.

### 178 **Development of the NGSST**

179 We cultured the six microorganisms, counted colonies forming units (CFU) by their  
180 exponential growth on different agar plates, and diluted them into samples with  
181 microorganism concentrations at 0.1, 0.2, 0.5, 1, 10, 50, and 100 CFU. Since  
182 microorganisms in environment or solution may lead to false positive results, we  
183 prepared control samples with sterile water. With these samples as starting material, we  
184 conducted multiple displacement amplification (Table S1), libraries construction, and  
185 whole genome sequencing. The average sequencing data size was about 8 Gb (Table  
186 S2). We mapped reads onto microbial marker genes by using MetaPhlAn2, calculated

187 RPKM (reads per kilobase per million mapped reads), and computed RPKM ratio  
188 (RPKMr) for each microorganism as following:

189 
$$\text{RPKM ratio} = \text{RPKM (sample)} / \text{RPKM (sterile water)}.$$

190 Most of sample's RPKMrs were more than 100 (Figure 2a).

191 To determine RPKMr threshold, we established ROC curve and found that RPKMr  
192  $\geq 2.45$  (AUC=0.983) would lead to high specificity and sensitivity (specificity=0.924,  
193 sensitivity=0.988; Figure 2b). Using this threshold, we found that 47 out of all the 48  
194 samples were detected positive of NGSST (Figure 2a). Interestingly, the NGSST showed  
195 high sensitivity that samples with microorganism concentration at 0.1CFU, 0.2CFU,  
196 and 0.5CFU could be detected by the NGSST (Figures 2a and 2c). Furthermore, we  
197 conducted sterility testing on these samples by using BacT/ALERT 3D, and found  
198 that the NGSST (positive, 17 out of 18) displayed more accurate results than the  
199 BacT/ALERT 3D (positive, 4 out of 18; Figure 2c). To validate this high sensitivity,  
200 we cultured the 0.1 and 0.2 CFU *E. coli* in medium for 14 days, and both sterility testing  
201 by NGSST and BacT/ALERT 3D method displayed positive signal (Figure 2d).

## 202 **The application of NGSST on cell suspension**

203 When the NGSST applied in mammalian cell suspension, plenty of nucleic acids  
204 released from mammalian cells appear to hinder the testing accuracy of the NGSST. To  
205 study the negative effect of human cells on the NGSST method, we prepared testing  
206 samples of MSC + *E. coli* by mixing human mesenchymal stem cells with 1, 5, 10, 50,  
207 and 100 CFU of *E. coli*. We conducted the NGSST which reported positive on all the  
208 MSC + *E. coli* samples (Figure 3a). However, the RPKMr values of MSC + *E. coli*  
209 samples were much smaller than that of *E. coli* samples.

210 We analyzed sequencing reads by alignment to references of human genome or  
211 marker genes of MetaPhlAn2 database. The percentage of MSC + *E. coli* samples' reads  
212 mapped to human genome reference ( $>95\%$ ) was around 50 folds than that of *E. coli*  
213 samples ( $<2\%$ , Figure 3b), indicating that most of the sequencing reads were from  
214 human cells in MSC + *E. coli* samples. The values of reads mapped to MetaPhlAn2  
215 database per million reads of MSC + *E. coli* samples (18 to 63) was much smaller than



216 that of *E. coli* samples (>2000, Figure 3c). Overall, these results indicated that NGSST  
217 can be used in cell suspension with the LOD of 1 CFU. Compared with LOD of 0.1  
218 CFU at *E. coli* group (Figure 2a), the sensitivity of sterility testing in MSC + *E. coli*  
219 samples was reduced due to most of the sequencing reads obtained from cultured cells.

## 220 **Identification of microorganisms by the NGSST**

221 To assess the capability of the NGSST in identifying microorganism, we mixed two  
222 microorganisms (*E. coli* and *S. aureus*) and performed the NGSST. Results showed that  
223 *E. coli* or *S. aureus* were detected in all mixed samples of the two microorganisms  
224 (Figure 4a). Interestingly, *S. aureus* were identified with RPKMr of ~18 folds than the  
225 threshold in the mixture of 0.1 CFU *S. aureus* and 100 CFU *E. coli*. In addition, we  
226 prepared samples containing *E. coli*, *S. aureus*, *P. aeruginosa*, and human MSC. The *E.*  
227 *coli*, *S. aureus*, or *P. aeruginosa* were identified by the NGSST in all the samples even  
228 in the 1 CFU group (Figure 4b).

229 Furthermore, we applied the NGSST in five samples of cultured umbilical cord  
230 mesenchymal stem cells which were reported positive from BacT/ALERT 3D testing.  
231 We identified several microorganisms in each of the five samples (Table 2).  
232 Interestingly, we also found that most of these identified bacteria strains are important  
233 components of vaginal microorganisms, which may be due to the contact between  
234 umbilical cord and vagina in vaginal birth [17]. Meanwhile, the total time required for  
235 NGSST method is roughly 24–48 hours, including whole genome amplication,  
236 sequencing, data analysis and interpretation, which is significantly shorter than current  
237 pharmacopoeia method (14 days).

## 238 **Discussion**

239 In this study, we developed and analytically validated the next-generation sequencing-  
240 based sterility test (NGSST) for biological products. Although the mNGS has been used  
241 for detection and characterization of pathogens in hospitalized patients [18], its  
242 application in sterility testing remained to be explored and optimized.

243 Currently, the available methods for rapid sterility testing include respiration based  
244 methods which use pharmacopoeia sterility testing and BacT/ALERT 3D system, and

245 isolated DNA-based methods which involve nucleic acid amplification and whole-  
246 genome sequencing, as well as exogenous fluorescent substance related methods, such  
247 as solid phase cytometry and ATP bioluminescence [19-23]. Each method has its unique  
248 advantages and limitations with regard to sensitivity, time, and microbial identification.

249 NGSST method has many advantages in sterility test. The NGSST has a higher  
250 detection sensitivity (1 CFU), comparing to pharmacopoeial sterility test (100 CFU),  
251 ATP bioluminescence (1000 CFU), and solid phase cytometry (approximately 10 CFU).  
252 As to the time required for testing, pharmacopeia sterility test requires as long as 14  
253 days, and the time required for NGSST method is about 48 hours, mainly involving  
254 whole genome amplification, DNA library construction, sequencing and data analysis.  
255 Furthermore, the NGSST is accurate for the identification of microorganisms. Although  
256 PCR amplification and sequencing of 16S ribosomal DNA also were used for microbial  
257 identification, the results are sometimes inaccurate due to the highly similar genomes  
258 between different microorganisms in 16S rDNA region. For example, although the  
259 DNA similarities between *Mycobacterium chelonae* and *Mycobacterium abscessus* is  
260 only 35%, the 16S r RNA has 99% homology. And other sterility testing methods lack  
261 the capability to identify microbial species.

262 The pipeline of NGSST method also overcomes certain challenges in application of  
263 whole genome sequencing in sterility testing. Most cell cultures or clinical samples may  
264 only contain small number of microorganisms, which makes it hard to directly extract  
265 sufficient DNA for sequencing. In 2014, Charles F. A. et al comparatively studied the  
266 performance of multiple displacement amplification (MDA), multiple annealing and  
267 looping based amplification cycles (MALBAC) and the PicoPLEX single cell WGA kit  
268 in single bacteria whole genome amplification, suggesting that a single bacterial cell  
269 with just 1 fg of genomic DNA is sufficient for WGA [24]. In NGSST method, we  
270 applied the MDA technology in amplification of bacteria and fungi genome, which  
271 effectively improves the detection sensitivity. Meanwhile, reproducibility threshold  
272 was established in the NGSST to correctly identify microorganisms from sequencing  
273 data and minimize false positive results. [25-27].

274 To avoid potential contaminations in the experimental process of WGA and DNA  
275 library construction, such as microorganisms from skin, environment and reagents , we  
276 utilized independent sterility testing room and ultraclean reagents with low level of  
277 DNA contamination, and as well set up conservative threshold values to minimize  
278 contamination [28].

279 Overall, we have explored the potential application of the NGSST in sterility testing  
280 of biological products, and demonstrated its high sensitivity, short detection period and  
281 capacity for microorganism identification. With continuously optimized cost of  
282 sequencing, the NGSST could be applied in in-process and product releasing stages of  
283 biological product manufacturing, as a supplementary to current pharmacopeia methods.  
284

## 285 **Declarations**

### 286 **Ethics approval and consent to participate**

287 This study was approved by the Institutional Review Board of BGI (No. BGI-IRB  
288 19025-1-T1).

### 289 **Consent for publication**

290 This Article is original, is not under consideration or has not been previous published  
291 elsewhere and its content has not been anticipated by any previous publication. All  
292 authors consent to publication of the article in Genome Research.

### 293 **Availability of data and material**

294 The data that support the findings of this study have been deposited into CNGB  
295 Sequence Archive (CNSA) [29] of China National GeneBank DataBase (CNGBdb)  
296 [30] with accession number CNP0001476.

### 297 **Competing Interests**

298 The authors declare that they have no competing interests.

### 299 **Funding**

300 This work was supported by Science, Technology and Innovation Commission of  
301 Shenzhen Municipality under grant No. KQJSCX20170322143848413 to X.Z. and  
302 Shenzhen Municipal Government of China under grant No. 20170731162715261 to  
303 B. L. The funders had no role in study design, data collection and analysis, decision  
304 to publish, or preparation of the manuscript. It was also supported by BGI-Shenzhen.  
305 We thank members of China National GeneBank for technical support.

### 306 **Author's contributions**

307 X.Z., B.L. and J.Y., designed the study. J.Y., X.J., Q.M., performed the experiments.  
308 C.C. and B.L. were responsible for the data acquisition and data analysis. X.Z., B.L.,  
309 and J.Y. co-wrote the manuscript.

### 310 **Acknowledgements**

311 We sincerely thank the support provided by China National GeneBank.

312

### 313 **Reference**

- 314 1. United States Pharmacopeia 28 and National Formulary 23 (USP 28 NF 23), Sterility Tests,  
315 General Chapter 71, pp. 1-13 (2005).
- 316 2 Decool A, Goury V, Tibi A, et al. Detection of bacterial adenosine triphosphate through  
317 bioluminescence, applied to a rapid sterility test of injectable preparations[J]. *Analytica chimica*  
318 *acta*, 1991, 255(2): 423-425.
- 319 3 Vaneechoutte M, Van Eldere J. The possibilities and limitations of nucleic acid amplification  
320 technology in diagnostic microbiology[J]. *Journal of medical microbiology*, 1997, 46(3): 188-194.
- 321 4 JIMENEZ L, IGNAR R, D'AIELLO R, et al. Use of PCR analysis for sterility testing in  
322 pharmaceutical environments[J]. *Journal of Rapid Methods & Automation in Microbiology*, 2000,  
323 8(1): 11-20.
- 324 5 Simner P J, Miller S, Carroll K C. Understanding the promises and hurdles of metagenomic next-  
325 generation sequencing as a diagnostic tool for infectious diseases[J]. *Clinical Infectious Diseases*,  
326 2018, 66(5): 778-788.
- 327 6 Hasman H, Saputra D, Sicheritz-Pontén T, et al. Rapid whole-genome sequencing for detection  
328 and characterization of microorganisms directly from clinical samples[J]. *Journal of clinical*  
329 *microbiology*, 2014, 52(1): 139-146.
- 330 7 Sabat A J, van Zanten E, Akkerboom V, et al. Targeted next-generation sequencing of the 16S-23S  
331 rRNA region for culture-independent bacterial identification-increased discrimination of closely

- 332 related species[J]. *Scientific reports*, 2017, 7(1): 1-12.
- 333 8 Schuurman T, De Boer R F, Kooistra-Smid A M D, et al. Prospective study of use of PCR  
334 amplification and sequencing of 16S ribosomal DNA from cerebrospinal fluid for diagnosis of  
335 bacterial meningitis in a clinical setting[J]. *Journal of clinical microbiology*, 2004, 42(2): 734-740.
- 336 9 Didelot X, Bowden R, Wilson D J, et al. Transforming clinical microbiology with bacterial  
337 genome sequencing[J]. *Nature Reviews Genetics*, 2012, 13(9): 601-612.
- 338 10 Gu W, Miller S, Chiu C Y. Clinical metagenomic next-generation sequencing for pathogen  
339 detection[J]. *Annual Review of Pathology: Mechanisms of Disease*, 2019, 14: 319-338.
- 340 11 Schlaberg R, Chiu C Y, Miller S, et al. Validation of metagenomic next-generation sequencing  
341 tests for universal pathogen detection[J]. *Archives of Pathology and Laboratory Medicine*, 2017,  
342 141(6): 776-786.
- 343 12 Huang M, Yang F, Fu J, et al. Reaction parameter comparison and optimization of multiple  
344 displacement amplification[J]. *Analytical Methods*, 2020, 12(1): 46-53.
- 345 13 Chen C, Shi C, Huang X, Zheng J, Zhu Z, Li Q, Qiu S, Huang Z, Zhuang Z, Wu R et al: Molecular  
346 Profiles and Metastasis Markers in Chinese Patients with Gastric Carcinoma. *Sci Rep* 2019,  
347 9(1):13995.
- 348 14 Chen S, Zhou Y, Chen Y, Gu J: fastp: an ultra-fast all-in-one FASTQ preprocessor. *Bioinformatics*  
349 2018, 34(17):i884-i890.
- 350 15 Kim D, Langmead B, Salzberg SL: HISAT: a fast spliced aligner with low memory requirements.  
351 *Nature Methods* 2015, 12(4):357-360.
- 352 16 Truong DT, Franzosa EA, Tickle TL, Scholz M, Weingart G, Pasolli E, Tett A, Huttenhower C,  
353 Segata N: MetaPhlan2 for enhanced metagenomic taxonomic profiling. *Nat Methods* 2015,  
354 12(10):902-903.
- 355 17 Amabebe E, Anumba D O C. The vaginal microenvironment: the physiologic role of  
356 lactobacilli[J]. *Frontiers in medicine*, 2018, 5: 181.
- 357 18 Wilson MR, Naccache SN, Samayoa E, Biagtan M, Bashir H, Yu G, Salamat  
358 SM, Somasekar S, Federman S, Miller S, et al. 2014. Actionable diagnosis of neuroleptospirosis by next-  
359 generation sequencing. *N Eng J Med* 370: 2408–2417.
- 360 19 PINTO T J A, LIRA R S, OLIVEIRA W A, et al. Application of the Bact/ALERT® 3D System  
361 for Sterility Testing of Injectable Products[J].
- 362 20. Baumstummeler, A., Chollet, R., Meder, H., Rofel, C., Venchiarutti, A., & Ribault, S. (2010).  
363 Detection of microbial contamination in mammalian cell cultures using a new fluorescence-based  
364 staining method. *Letters in Applied Microbiology*, 51(6), 671–677.
- 365 21 Kapoor R, Yadav J S. Development of a rapid ATP bioluminescence assay for biocidal  
366 susceptibility testing of rapidly growing mycobacteria[J]. *Journal of clinical microbiology*, 2010,  
367 48(10): 3725-3728.
- 368 22 Smith R, Von Tress M, Tubb C, et al. Evaluation of the ScanRDI® as a rapid alternative to the  
369 pharmacopoeial sterility test method: comparison of the limits of detection[J]. *PDA Journal of*  
370 *Pharmaceutical Science and Technology*, 2010, 64(4): 356-363.
- 371 23 Thierry Bonnevey, R. Breton et al. The development of compendial rapid sterility tests.  
372 *Pharmacopoeial Forum*, 2017. 43(5)
- 373 24 de Bourcy CF, De Vlaminck I, Kanbar JN, Wang J, Gawad C, Quake SR. A quantitative  
374 comparison of single-cell whole genome amplification methods. *PLoS One*. 2014;9(8):e105585.
- 375 25 Miller S, Naccache S N, Samayoa E, et al. Laboratory validation of a clinical metagenomic

376 sequencing assay for pathogen detection in cerebrospinal fluid[J]. *Genome research*, 2019, 29(5):  
377 831-842.

378 26 Hasman H, Saputra D, Sicheritz-Pontén T, et al. Rapid whole-genome sequencing for detection  
379 and characterization of microorganisms directly from clinical samples[J]. *Journal of clinical*  
380 *microbiology*, 2014, 52(1): 139-146.

381 27 Schlager R, Chiu C Y, Miller S, et al. Validation of metagenomic next-generation sequencing  
382 tests for universal pathogen detection[J]. *Archives of Pathology and Laboratory Medicine*, 2017,  
383 141(6): 776-786.

384 28 Motley S T, Picuri J M, Crowder C D, et al. Improved multiple displacement amplification  
385 (iMDA) and ultraclean reagents[J]. *BMC genomics*, 2014, 15(1): 443.

386 29 Guo, X., Chen, F., Gao, F., Li, L., Liu, K., You, L., Hua, C., Yang, F., Liu, W., Peng, C., et al.  
387 (2020). CNSA: a data repository for archiving omics data. *Database (Oxford)* 2020.

388 30 Chen FZ, You LJ, Yang F, et al. CNGBdb: China National GeneBank DataBase, *Hereditas*.  
389 2020;42(08):799-809.

390

391 **Table 1.** Selected microorganisms in development and evaluation of the NGSST.

| <b>Microorganisms</b>     | <b>Strain ID</b> | <b>Anaerobic<br/>/aerobic</b> | <b>Gram Stain</b> | <b>Incubation<br/>temperature</b> | <b>GC-rich</b> |
|---------------------------|------------------|-------------------------------|-------------------|-----------------------------------|----------------|
| Bacillus subtilis         | CMCC(B)63501     | aerobic                       | Gram-positive     | 30–35                             | 44%            |
| Candida albicans          | CMCC(F)98001     | aerobic                       | Yeast             | 20-25                             | 39%            |
| Clostridium sporogenes    | CMCC(B)64941     | anaerobic                     | Gram-positive     | 30–35                             | 27%            |
| Escherichia coli          | ATCC 8739        | aerobic/an-<br>aerobic        | Gram-negative     | 30–35                             | 51%            |
| Pseudomonas<br>aeruginosa | CMCC(B)10104     | aerobic                       | Gram-negative     | 30–35                             | 54%            |
| Staphylococcus aureus     | CMCC(B)26003     | aerobic                       | Gram-positive     | 30–35                             | 33%            |

392

393

394 **Table 2** The microorganisms detected by NGSST on primary umbilical cord MSCs.

| Samples                      | Sterility testing by BacT/ALERT 3D | Species                              | RPKMr     |
|------------------------------|------------------------------------|--------------------------------------|-----------|
| ucMSC-1                      | Positive                           | <i>Bacteroides coprophilus</i>       | 58.0      |
|                              |                                    | <i>Erysipelotrichaceae bacterium</i> | 87.0      |
|                              |                                    | <i>Lactobacillus iners</i>           | 441.0     |
|                              |                                    | <i>Ureaplasma parvum</i>             | 1025.0    |
| ucMSC-2                      | Positive                           | <i>Ureaplasma parvum</i>             | 2584684.0 |
|                              |                                    | <i>Ureaplasma urealyticum</i>        | 18261.0   |
|                              |                                    | <i>Xanthomonas perforans</i>         | 22.9      |
| ucMSC-3                      | Positive                           | <i>Acinetobacter sp NIPH</i>         | 60.0      |
|                              |                                    | <i>Bacteroides sp</i>                | 49.0      |
|                              |                                    | <i>Clostridium sp HGF2</i>           | 118.0     |
|                              |                                    | <i>Desulfovibrio sp</i>              | 110.0     |
|                              |                                    | <i>Erysipelotrichaceae bacterium</i> | 68.0      |
|                              |                                    | <i>Lactobacillus iners</i>           | 247.0     |
|                              |                                    | <i>Parabacteroides sp</i>            | 97.0      |
|                              |                                    | <i>Ureaplasma parvum</i>             | 472.0     |
| <i>Xanthomonas perforans</i> | 17.2                               |                                      |           |
| ucMSC-4                      | Positive                           | <i>Xanthomonas perforans</i>         | 51.5      |
| ucMSC-5                      | Positive                           | <i>Achromobacter xylooxidans</i>     | 13.3      |
|                              |                                    | <i>Acinetobacter lwoffii</i>         | 54.0      |
|                              |                                    | <i>Afipia broomeae</i>               | 169.0     |
|                              |                                    | <i>Enterobacter cloacae</i>          | 5560.0    |
|                              |                                    | <i>Escherichia coli</i>              | 209.3     |
|                              |                                    | <i>Haemophilus aegyptius</i>         | 178.0     |
|                              |                                    | <i>Haemophilus haemolyticus</i>      | 28.0      |
|                              |                                    | <i>Haemophilus influenzae</i>        | 36582.0   |
|                              |                                    | <i>Klebsiella sp KTE92</i>           | 3155.0    |
|                              |                                    | <i>Propionibacterium acnes</i>       | 462.0     |
|                              |                                    | <i>Ralstonia solanacearum</i>        | 26.0      |
|                              |                                    | <i>Sphingomonas melonis</i>          | 15.5      |
|                              |                                    | <i>Staphylococcus warneri</i>        | 128.1     |
| <i>Xanthomonas perforans</i> | 11.9                               |                                      |           |

395



396 **FIGURE LEGEND**

397

398 **Figure 1.** Design of the NGSST. **(a)** Schematic diagram of the NGSST on biological  
399 products. **(b)** Development and application of the NGSST. LOD, limit of detection.

400

401 **Figure 2.** Establishment of the NGSST. **(a)** Whole genome sequencing and RPKM ratio  
402 of the six model microorganisms. Numbers on the X axis denote CFU (colonies forming  
403 units) of microorganisms through dilutions. **(b)** The determination of RPKMr threshold  
404 (RPKMr  $\geq 2.45$ , AUC=0.983) based on ROC curve (specificity=0.924;  
405 sensitivity=0.988). **(c)** Higher sensitivity of the NGSST than that of BacT/ALERT 3D.  
406 **(d)** Validations of the NGSST's high sensitivity (0.1-0.2 CFU) by using culture  
407 compared with BacT/ALERT 3D.

408

409 **Figure 3.** The NGSST LOD on the cell suspension mixed with *E. coli*. **(a)** The RPKMr  
410 values of the mixed suspension and *E. coli* samples. Numbers on the X axis denote CFU  
411 of microorganisms through dilutions. The human genome mapping rate **(b)** and marker  
412 reads per million mapped reads **(c)** in the mixed suspension and *E. coli* samples.

413

414 **Figure 4.** Identification of microorganisms by the NGSST. Detecting microorganism in  
415 two bacteria **(a)** or mixture of three bacteria and human MSC **(b)**. Red dotted line  
416 represents the NGSST threshold.

417

**a**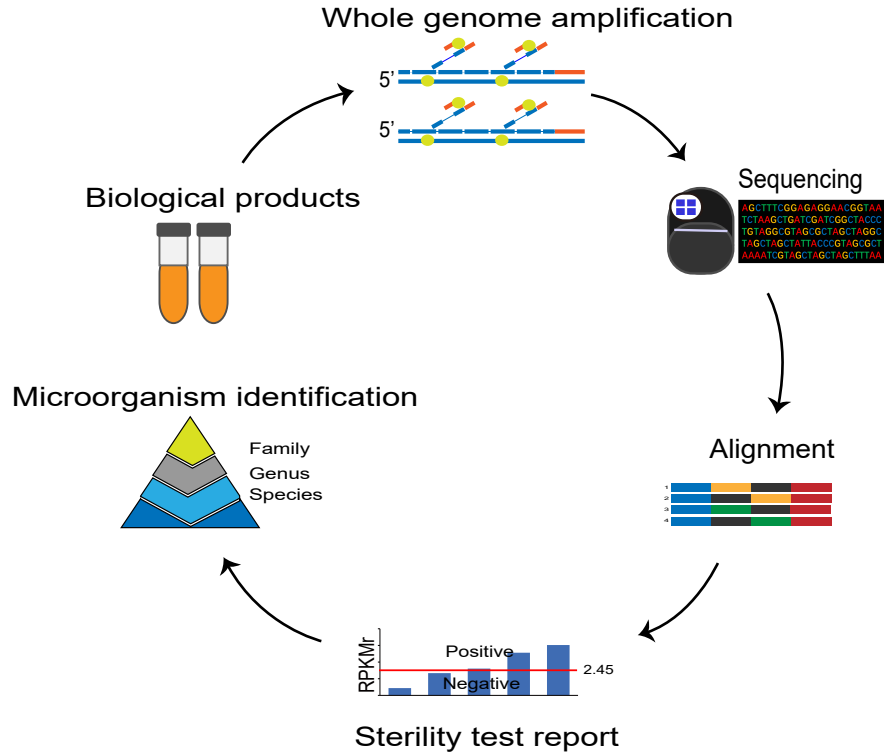**b**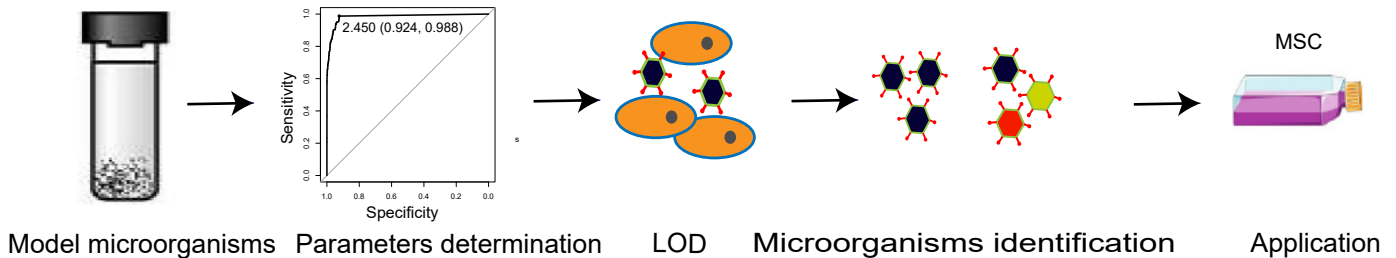

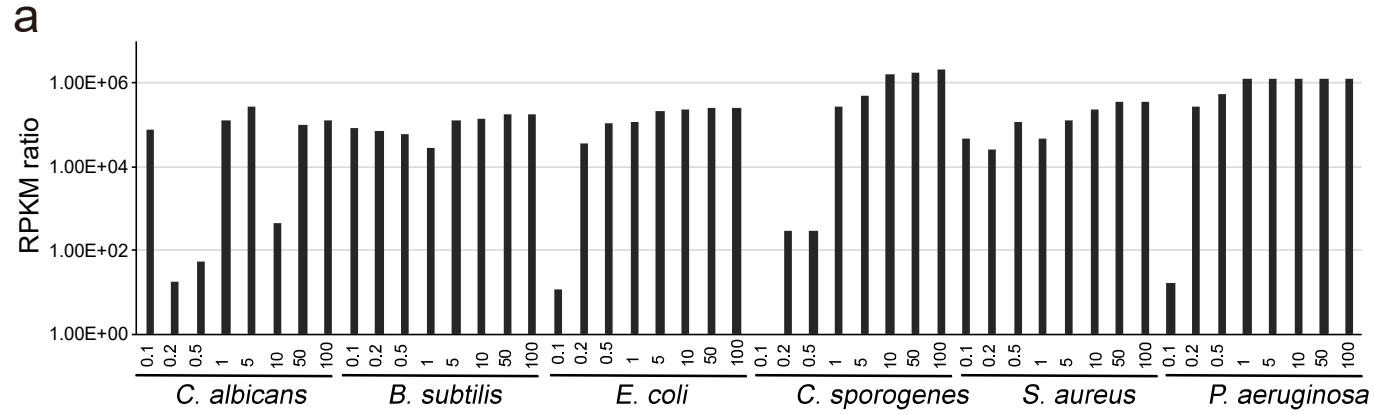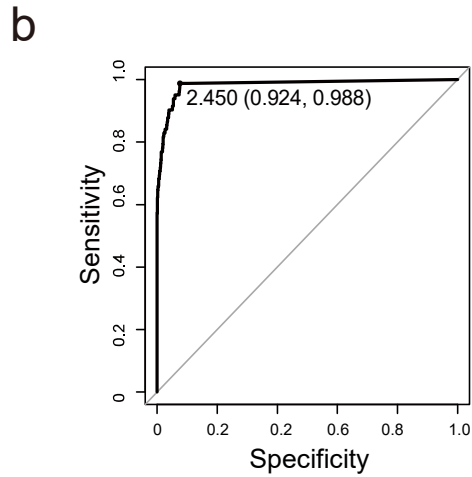

**c**

| Microorganisms       | CFU | NGSST    | BacT/ALERT 3D |
|----------------------|-----|----------|---------------|
| <i>B. subtilis</i>   | 0.1 | Positive | Negative      |
|                      | 0.2 | Positive | Negative      |
|                      | 0.5 | Positive | Negative      |
| <i>C. albicans</i>   | 0.1 | Positive | Negative      |
|                      | 0.2 | Positive | Negative      |
|                      | 0.5 | Positive | Positive      |
| <i>C. sporogenes</i> | 0.1 | Negative | Negative      |
|                      | 0.2 | Positive | Negative      |
|                      | 0.5 | Positive | Negative      |
| <i>E. coli</i>       | 0.1 | Positive | Negative      |
|                      | 0.2 | Positive | Negative      |
|                      | 0.5 | Positive | Positive      |
| <i>P. aeruginosa</i> | 0.1 | Positive | Negative      |
|                      | 0.2 | Positive | Negative      |
|                      | 0.5 | Positive | Negative      |
| <i>S. aureus</i>     | 0.1 | Positive | Positive      |
|                      | 0.2 | Positive | Positive      |
|                      | 0.5 | Positive | Positive      |

**d**

| Sample              | CFU | BacT/ALERT 3D | NGSST    |
|---------------------|-----|---------------|----------|
| Culture for 0 days  |     |               |          |
| <i>E. coli</i>      | 0.1 | Negative      | Positive |
| <i>E. coli</i>      | 0.2 | Negative      | Positive |
| Culture for 14 days |     |               |          |
| <i>E. coli</i>      | 0.1 | Positive      | Positive |
| <i>E. coli</i>      | 0.2 | Positive      | Positive |

**a**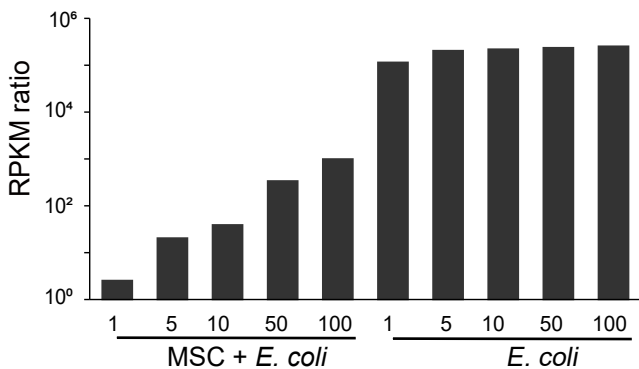**b**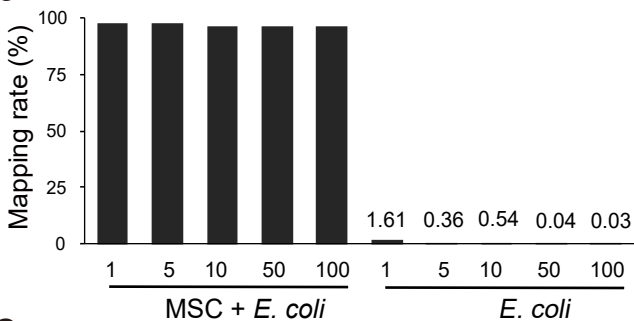**c**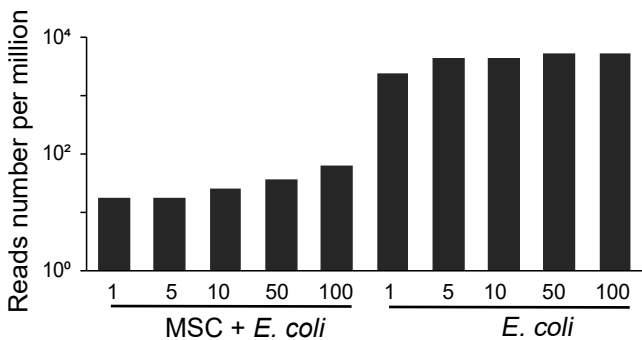

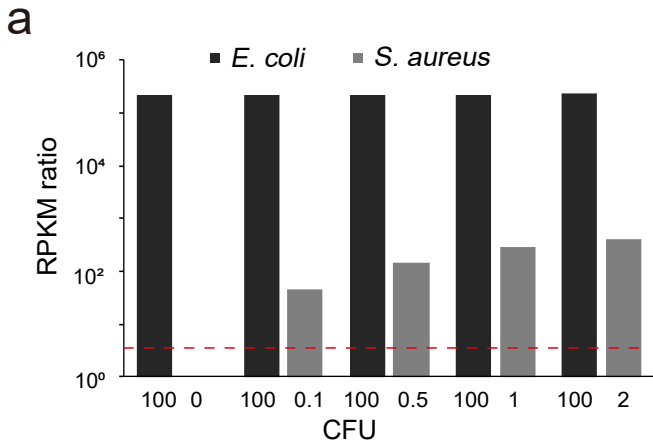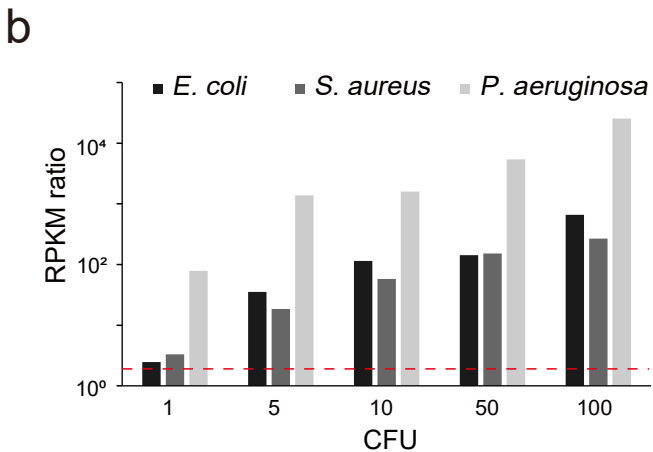

Source: https://www.biorxiv.org/content/10.1101/2020.12.27.424516v1.full.pdf
